# Supplementary material
Source: PubMed Central journal article supplement (PMC8009766)
Supplement: NIHMS1596277-supplement-1.pdf [file NIHMS1596277-supplement-1.pdf]

**Table 5 (Supplementary Table 1).** Registries and birth years, total number of births and total number of CDH cases, total prevalence, live birth proportion, ETOPFA proportion, and first week mortality among live birth proportion for the total surveillance period, 1974 – 2015.

| Country-Registry                   | Surveillance Period | Total Births<br>N | Total CDH<br>N | Total Prevalence per<br>10,000 births<br>(95% CI) | Live Birth<br>% | Stillbirth<br>% | ETOPFA<br>%      | 1 Week Mortality<br>among Live Births<br>% |
|------------------------------------|---------------------|-------------------|----------------|---------------------------------------------------|-----------------|-----------------|------------------|--------------------------------------------|
| <b>Hospital-Based Registries</b>   |                     |                   |                |                                                   |                 |                 |                  |                                            |
| Argentina-RENAC <sup>1</sup>       | 2009-2014           | 1,023,108         | 352            | 3.4 (3.1, 3.8)                                    | 96.9            | 3.1             | -                | 50.1                                       |
| Colombia-Bogotá <sup>2</sup>       | 2000-2014           | 407,394           | 87             | 2.2 (1.7, 2.7)                                    | 97.7            | 2.3             | -                | 21.2                                       |
| Colombia-Cali <sup>2</sup>         | 2011-2014           | 27,294            | 5              | 1.8 (0.6, 4.3)                                    | 80.0            | 20.0            | -                | 0.0                                        |
| South America-ECLAMC <sup>1</sup>  | 1995-2014           | 2,927,555         | 1,091          | 3.7 (3.5, 4.0)                                    | 93.5            | 6.5             | -                | 51.2                                       |
| Spain-ECEMC                        | 1986-2013           | 2,135,249         | 280            | 1.3 (1.2, 1.5)                                    | 93.6            | 6.4             | -                | 37.8                                       |
| Spain-ECEMC (Incl. ETOPFA)         | 1995-2013           | 373,698           | 83             | 2.2 (1.8, 2.7)                                    | 44.6            | 2.4             | 53.0             | 27.0                                       |
| Mexico-RYVEMCE <sup>1</sup>        | 1978-2013           | 1,198,579         | 96             | 0.8 (0.6, 1.0)                                    | 93.8            | 6.2             | -                | 23.3                                       |
| Iran-TROCA                         | 2004-2012           | 160,755           | 92             | 5.7 (4.6, 7.0)                                    | 97.8            | 1.1             | 1.1              | 2.2                                        |
| Israel-SMC <sup>3</sup>            | 2000-2014           | 200,660           | 46             | 2.3 (1.7, 3.1)                                    | 100.0           | -               | -                | 36.9                                       |
| <b>TOTAL</b>                       |                     | <b>8,454,292</b>  | <b>2,132</b>   | <b>2.5 (2.4, 2.6)</b>                             | <b>92.6</b>     | <b>5.3</b>      | <b>2.1</b>       | <b>43.4</b>                                |
| <b>Population-Based Registries</b> |                     |                   |                |                                                   |                 |                 |                  |                                            |
| Costa Rica-CREC <sup>1</sup>       | 2000-2014           | 1,097,128         | 210            | 1.9 (1.7, 2.2)                                    | 99.0            | 1.0             | -                | 43.3                                       |
| Czech Republic                     | 1993-2014           | 2,269,002         | 493            | 2.2 (2.0, 2.4)                                    | 81.7            | 0.5             | 17.8             | 23.8                                       |
| France-Paris                       | 1981-2014           | 875,241           | 241            | 2.8 (2.4, 3.1)                                    | 68.5            | 4.1             | 27.4             | 39.4                                       |
| Germany-Saxony Anhalt              | 1980-2014           | 526,289           | 126            | 2.4 (2.0, 2.9)                                    | 73.8            | 14.3            | 11.9             | 37.6                                       |
| Italy-Lombardy                     | 2003-2012           | 133,182           | 37             | 2.8 (2.0, 3.8)                                    | 67.6            | 16.2            | 16.2             | 16.0                                       |
| Italy-Tuscany                      | 1992-2014           | 636,562           | 117            | 1.8 (1.5, 2.2)                                    | 81.2            | 2.6             | 16.2             | 21.0                                       |
| Malta-MCAR <sup>1</sup>            | 1995-2013           | 79,948            | 47             | 5.9 (4.3, 7.8)                                    | 93.6            | 6.4             | -                | 40.9                                       |
| Netherlands-Northern               | 1981-2014           | 562,462           | 150            | 2.7 (2.3, 3.1)                                    | 80.7            | 6.0             | 13.3             | 35.5                                       |
| Slovak Republic                    | 2001-2013           | 722,978           | 129            | 1.8 (1.5, 2.1)                                    | 97.7            | 1.5             | 0.8              | 38.9                                       |
| Sweden                             | 1987-1998           | 1,299,866         | 361            | 2.8 (2.5, 3.1)                                    | 99.7            | 0.3             | -                | 27.8                                       |
| Sweden (Incl. ETOPFA)              | 1999-2014           | 1,632,510         | 521            | 3.2 (2.9, 3.5)                                    | 71.4            | 1.3             | 27.3             | 15.1                                       |
| Ukraine-OMNI-Net                   | 2000-2013           | 404,172           | 124            | 3.1 (2.6, 3.7)                                    | 62.9            | 13.7            | 21.0             | 33.3                                       |
| United Kingdom-Wales               | 1998-2014           | 569,341           | 223            | 3.9 (3.4, 4.5)                                    | 70.9            | 0.4             | 28.7             | 24.1                                       |
| Mexico-Nuevo León <sup>1</sup>     | 2011-2015           | 442,674           | 78             | 1.8 (1.4, 2.2)                                    | 100.0           | -               | -                | 61.5                                       |
| USA-Arkansas                       | 1993-2012           | 760,777           | 260            | 3.4 (3.0, 3.9)                                    | 96.5            | 2.7             | 0.4              | 24.7                                       |
| USA-Atlanta                        | 1974-2012           | 1,535,037         | 440            | 2.9 (2.6, 3.1)                                    | 82.0            | 5.2             | 8.0 <sup>4</sup> | 28.8                                       |
| USA-Texas                          | 1996-2012           | 5,980,798         | 1,644          | 2.7 (2.6, 2.9)                                    | 95.5            | 3.0             | 1.5              | 18.3                                       |
| USA-Utah                           | 1999-2012           | 719,011           | 248            | 3.4 (3.0, 3.9)                                    | 90.7            | 6.5             | 2.8              | 21.8                                       |
| <b>TOTAL</b>                       |                     | <b>20,246,978</b> | <b>5,449</b>   | <b>2.7 (2.6, 2.8)</b>                             | <b>86.9</b>     | <b>3.2</b>      | <b>9.5</b>       | <b>25.1</b>                                |
| <b>ALL REGISTRIES</b>              |                     | <b>28,701,270</b> | <b>7,581</b>   | <b>2.6 (2.5, 2.7)</b>                             | <b>88.5</b>     | <b>3.8</b>      | <b>7.4</b>       | <b>30.5</b>                                |

<sup>1</sup>ETOPFA not allowed; <sup>2</sup>ETOPFA not registered; <sup>3</sup>data on live born children with congenital diaphragmatic hernia from one hospital; <sup>4</sup>Elective terminations were ascertained from prenatal diagnostic sites beginning 1994, prior to that they were only rarely ascertained from hospital records. CREC=Costa Rican Birth Defect Registry; ECEMC=Spanish Collaborative Study of Congenital Malformations; ECLAMC=Latin American Collaborative Study of Congenital Malformations; ETOPFA=Elective termination of pregnancy for fetal anomalies; MCAR=Malta Congenital Anomalies Registry; OMNI-Net=Ukraine Birth Defects Prevention

Program; RENAC=National Network of Congenital Anomalies of Argentina; RYVEMCE=Mexican Registry and Epidemiological Surveillance of External Congenital Malformations; TROCA=Tabriz Registry of Congenital Anomalies; SMC=Soroka Medical Center; USA=United States of America.
